# Supplementary material for: Assessment of New and Genome-Reduced Pseudomonas Strains Regarding Their Robustness as Chassis in Biotechnological Applications
Source: MDPI journal article supplement (doi:10.3390/microorganisms11040837), 2023-03-25
Supplement: s1 [file s1]

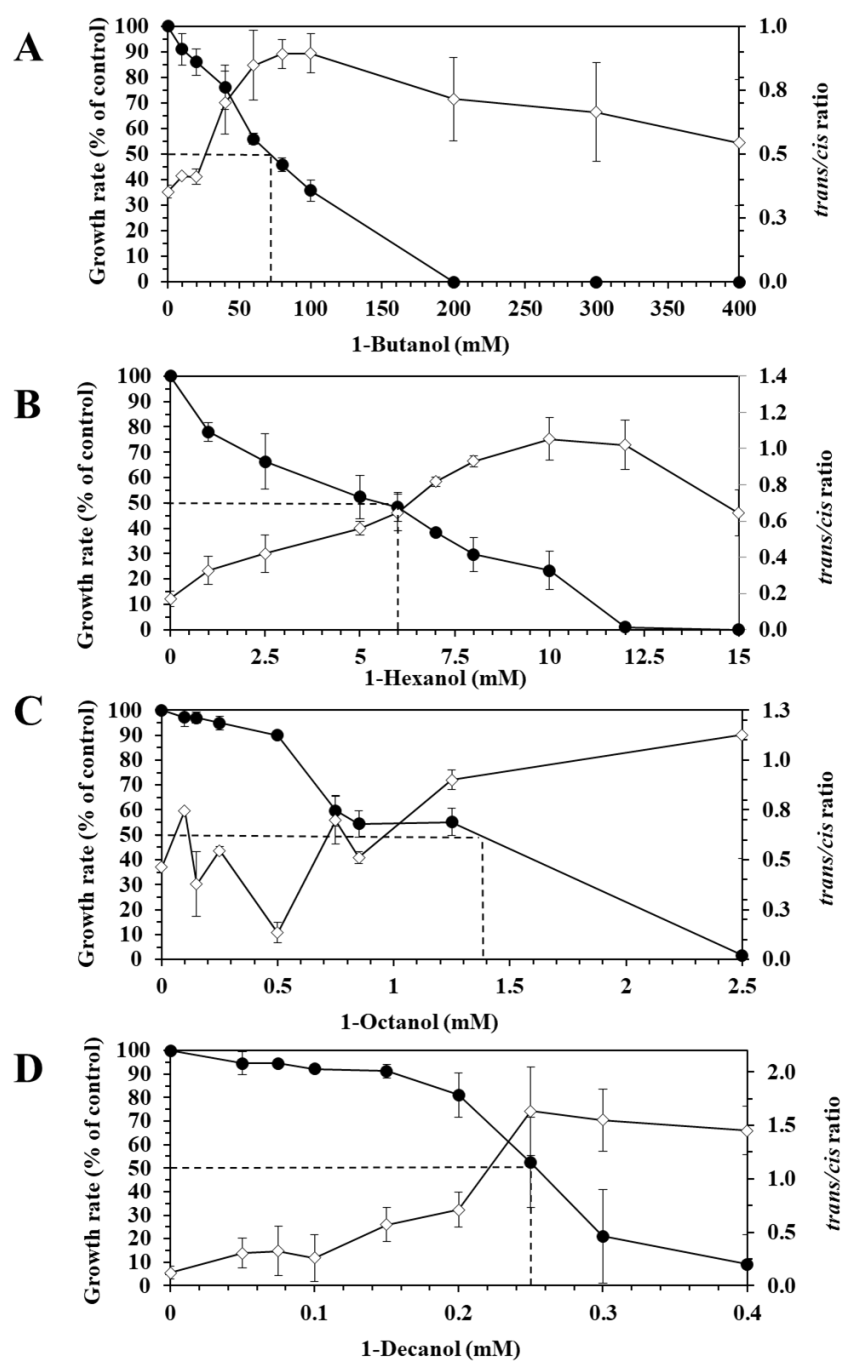

**Figure S1.** Growth rates (black circles) and *trans/cis* ratios (white diamonds) of *P. taiwanensis* GRC3 incubated with different *n*-alkanols: (A) 1-butanol, (B) 1-hexanol, (C) 1-octanol and (D) 1-decanol.
